# Supplementary material for: Unveiling the intrinsic electrochemical mechanism of supporting electrolyte and the interaction mechanism in electrochemical oxidation of tetracycline with nano-PbO2
Source: Royal Society of Chemistry journal article supplement (doi:10.1039/d4en00842a), 2024-11-12
Supplement: d4en00842a1.pdf [file d4en00842a1.pdf]

**Unveiling intrinsic electrochemical mechanism of supporting electrolyte and interaction  
mechanism in electrochemical oxidation tetracycline with nano-PbO<sub>2</sub>**

Yaxuan Wang <sup>a, b, #</sup>, Peitong Cen <sup>a, #</sup>, Hongyu Wang <sup>a, #</sup>, Chenxi Li <sup>a</sup>, Ziyin Xia <sup>a</sup>, Guoqing Wu <sup>a</sup>,  
Meng Li <sup>a, \*</sup>, Lei Huang <sup>a</sup>, Jia Yan <sup>a</sup>, Shaoqi Zhou <sup>c</sup>, Ce-Hui Mo <sup>d</sup>, Hongguo Zhang <sup>a, e, \*</sup>

- a. School of Environmental Science and Engineering, Guangzhou University, Guangzhou, 510006, PR. China.
- b. Institute of Environment and Ecology, Shenzhen International Graduate School, Tsinghua University, Shenzhen 518055, China
- c. College of Resources and Environmental Engineering, Guizhou University, 2708 Huaxi Road, Guiyang 550025, PR. China.
- d. Guangdong Provincial Research Center for Environment Pollution Control and Remediation Materials, College of Life Science and Technology, Jinan University, Guangzhou 510632, PR. China.
- e. Guangzhou University-Linköping University Research Center on Urban Sustainable Development, Guangzhou University, Guangzhou 510006, PR. China.

Corresponding author.

E-mail address: mengli@gzhu.edu.cn (M. Li); hg Zhang@gzhu.edu.cn (H. Zhang)

# These authors have equally contributed to the work.

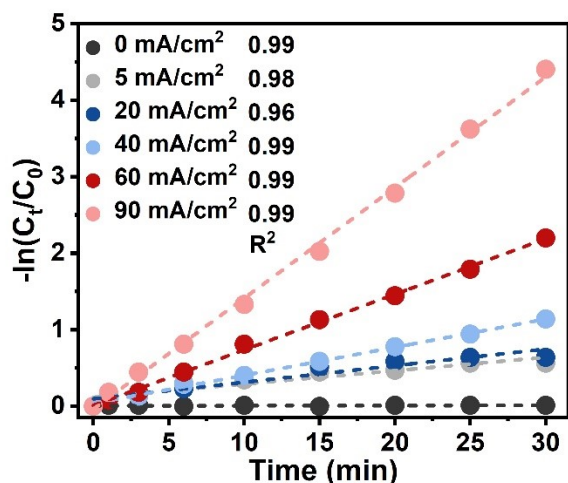

**Fig. S1** Kinetic curve of different current density on the removal of TC. Reaction conditions: Initial TC concentration of 2.5 mg L<sup>-1</sup>, the electrode spacing of 2.0 cm, the electrolyte concentration of 10.0 mM L<sup>-1</sup>.

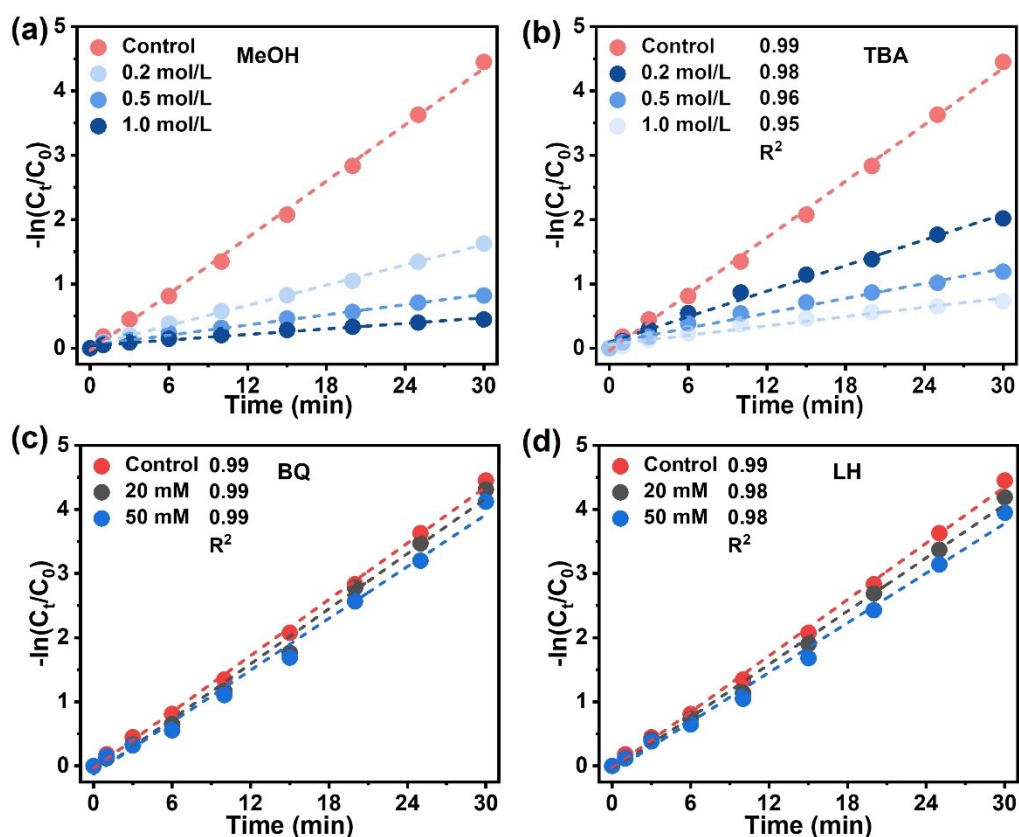

**Fig. S2** Kinetic curve of different quenchers on the removal of TC. Reaction conditions: Initial TC concentration of 2.5 mg L<sup>-1</sup>, the electrode spacing of 2.0 cm, the electrolyte concentration of 10.0 mM L<sup>-1</sup>, the current density of 90 mA cm<sup>-1</sup>.

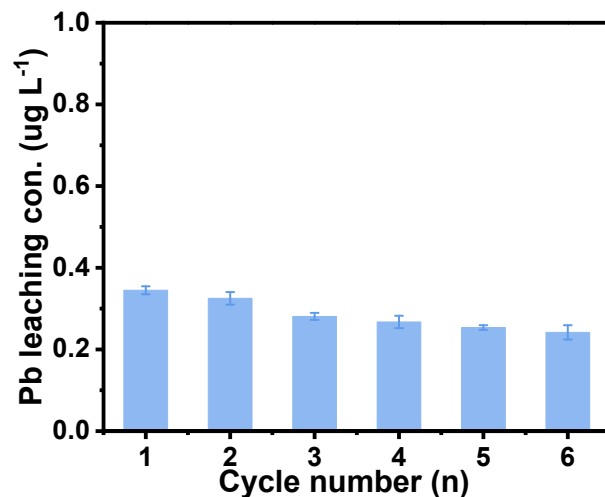

**Fig. S3** The leaching concentration of Pb ion after multiple cycles operations. Reaction conditions: Initial TC concentration of 2.5 mg L<sup>-1</sup>, the electrode spacing of 2.0 cm, the electrolyte concentration of 10.0 mM L<sup>-1</sup>, the current density of 90 mA cm<sup>-1</sup>.

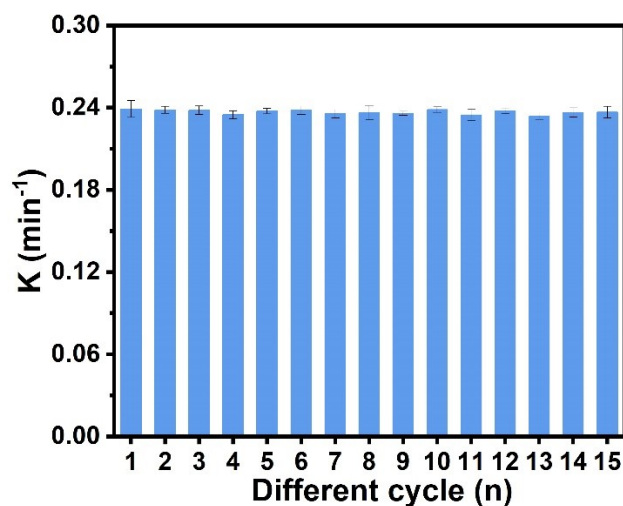

**Fig. S4** The kinetic rate constant for tetracycline removal under continuous 15-cycles operations. Reaction conditions: Initial TC concentration of 2.5 mg L<sup>-1</sup>, the electrode spacing of 2.0 cm, the electrolyte concentration of 10.0 mM L<sup>-1</sup>, the current density of 90 mA cm<sup>-1</sup>.

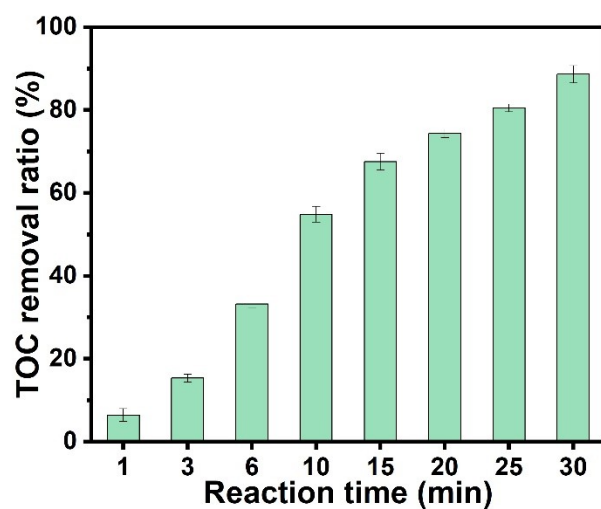

**Fig. S5.** The TOC removal ratio with the reaction time under the EO/PMS system. Reaction conditions: Initial TC concentration of  $2.5 \text{ mg L}^{-1}$ , the electrode spacing of 2.0 cm, the electrolyte concentration of  $10.0 \text{ mM L}^{-1}$ , the current density of  $90 \text{ mA cm}^{-1}$ .

**Table S1.** The calculated Fukui index value via DFT calculations.

| Atom  | q(N)    | q(N+1)  | q(N-1)  | f-      | f+     | f <sub>0</sub> | CDD     |
|-------|---------|---------|---------|---------|--------|----------------|---------|
| 1(C)  | -0.0605 | -0.0965 | -0.0583 | 0.0022  | 0.0360 | 0.0191         | 0.0338  |
| 2(C)  | 0.0897  | 0.0422  | 0.0912  | 0.0015  | 0.0475 | 0.0245         | 0.0460  |
| 3(C)  | -0.0418 | -0.0703 | -0.0407 | 0.0011  | 0.0285 | 0.0148         | 0.0274  |
| 4(C)  | 0.0082  | -0.0321 | 0.0092  | 0.0010  | 0.0403 | 0.0206         | 0.0393  |
| 5(C)  | -0.0527 | -0.0823 | -0.0508 | 0.0020  | 0.0296 | 0.0158         | 0.0276  |
| 6(C)  | -0.0179 | -0.0857 | -0.0162 | 0.0017  | 0.0678 | 0.0347         | 0.0661  |
| 8(C)  | 0.0941  | 0.0883  | 0.0954  | 0.0013  | 0.0059 | 0.0036         | 0.0046  |
| 11(C) | -0.0142 | -0.0212 | -0.0126 | 0.0016  | 0.0070 | 0.0043         | 0.0053  |
| 12(C) | -0.0497 | -0.0805 | -0.0477 | 0.0020  | 0.0309 | 0.0164         | 0.0289  |
| 13(C) | 0.0697  | 0.0588  | 0.0736  | 0.0040  | 0.0109 | 0.0074         | 0.0069  |
| 14(C) | -0.0648 | -0.0688 | -0.0498 | 0.0151  | 0.0040 | 0.0095         | -0.0111 |
| 15(C) | 0.1321  | 0.1286  | 0.1303  | -0.0017 | 0.0035 | 0.0009         | 0.0052  |
| 16(C) | 0.0187  | 0.0175  | 0.0546  | 0.0360  | 0.0012 | 0.0186         | -0.0348 |
| 18(C) | 0.0979  | 0.0185  | 0.0980  | 0.0001  | 0.0793 | 0.0397         | 0.0792  |
| 20(C) | 0.1383  | 0.0126  | 0.1404  | 0.0020  | 0.1257 | 0.0639         | 0.1237  |
| 21(O) | -0.2220 | -0.3338 | -0.2189 | 0.0031  | 0.1118 | 0.0575         | 0.1087  |
| 22(C) | 0.1379  | 0.1330  | 0.1447  | 0.0068  | 0.0049 | 0.0059         | -0.0019 |
| 23(O) | -0.2972 | -0.3113 | -0.2801 | 0.0171  | 0.0141 | 0.0156         | -0.0030 |
| 24(C) | 0.1684  | 0.1657  | 0.1736  | 0.0052  | 0.0027 | 0.0040         | -0.0025 |
| 25(O) | -0.3927 | -0.3973 | -0.3826 | 0.0101  | 0.0047 | 0.0074         | -0.0054 |
| 26(O) | -0.1405 | -0.1451 | -0.1303 | 0.0101  | 0.0047 | 0.0074         | -0.0055 |
| 28(O) | -0.2317 | -0.2423 | -0.2224 | 0.0093  | 0.0107 | 0.0100         | 0.0014  |
| 30(C) | -0.0856 | -0.0909 | -0.0838 | 0.0018  | 0.0053 | 0.0035         | 0.0035  |
| 34(N) | -0.1083 | -0.1095 | 0.1710  | 0.2793  | 0.0012 | 0.1403         | -0.2781 |
| 35(O) | -0.2520 | -0.2717 | -0.2434 | 0.0087  | 0.0196 | 0.0142         | 0.0110  |
| 37(N) | -0.0969 | -0.0986 | -0.0928 | 0.0041  | 0.0017 | 0.0029         | -0.0024 |
| 40(C) | -0.0405 | -0.0417 | 0.0168  | 0.0574  | 0.0011 | 0.0292         | -0.0562 |
| 44(C) | -0.0527 | -0.0538 | 0.0084  | 0.0611  | 0.0011 | 0.0311         | -0.0600 |
| 48(O) | -0.1918 | -0.2520 | -0.1886 | 0.0031  | 0.0602 | 0.0317         | 0.0570  |
| 50(O) | -0.2239 | -0.2641 | -0.2223 | 0.0017  | 0.0402 | 0.0209         | 0.0385  |
| 52(C) | -0.0414 | -0.0468 | -0.0360 | 0.0053  | 0.0054 | 0.0054         | 0.0001  |
| 55(C) | -0.0192 | -0.0216 | -0.0086 | 0.0106  | 0.0025 | 0.0065         | -0.0082 |

**Table S2.** The comparison of some previously reported studies on the removal of TC with our study.

| Method                                  | Electrode                                                        | Reaction condition for TC removal                                                                                                                                        | Removal (%) | Treatment time | Rate (min <sup>-1</sup> ) | Reference s |
|-----------------------------------------|------------------------------------------------------------------|--------------------------------------------------------------------------------------------------------------------------------------------------------------------------|-------------|----------------|---------------------------|-------------|
| Electro-Fenton                          | CoSA                                                             | Initial con. of 20 ppm, Na <sub>2</sub> SO <sub>4</sub> of 50 mM, voltage of 0.2 V, pH of 3.0, Fe <sup>2+</sup> con. of 0.5 mM.                                          | 94.9%       | 120 min        | 0.024                     | 1           |
| Electro/PMS                             | NiFe <sub>2</sub> O <sub>4</sub>                                 | Initial con. of 30 ppm, PMS of 1 mM, Current density = 2.5 mA cm <sup>-2</sup> , pH of 6.0.                                                                              | 81.7%       | 60 min         | 0.030                     | 2           |
| Electro-Fenton                          | ZIF-8                                                            | Initial con. of 20 ppm, Na <sub>2</sub> SO <sub>4</sub> = 100 mM, current density = 12 mA cm <sup>-2</sup> , PMS = 5 mM, Co <sup>2+</sup> con. of 15 ppm, pH of 5.0.     | 96.4%       | 120 min        | 0.027                     | 3           |
| Electro-Fenton                          | CoNC                                                             | Initial con. of 20 ppm, Na <sub>2</sub> SO <sub>4</sub> = 100 mM, current density = 6 mA cm <sup>-2</sup> , pH of 5.0, O <sub>2</sub> con. of 0.6 mL min <sup>-1</sup> . | 100%        | 30 min         | 0.042                     | 4           |
| Photocatalysis                          | C <sub>3</sub> N <sub>4</sub>                                    | Initial con. of 10 ppm, photo power of 250 W, catalyst con. of 300 mg pH of 6.0.                                                                                         | 88%         | 30 min         | 0.065                     | 5           |
| Photo-Fenton                            | In <sub>2</sub> O <sub>3</sub> /FeIn <sub>2</sub> S <sub>4</sub> | Initial con. of 20 ppm, photo power of 300 W, pH of 6.8, catalyst con. of 20 mg, H <sub>2</sub> O <sub>2</sub> of 250 μL.                                                | 98.3%       | 75 min         | 0.058                     | 6           |
| Photocatalysis                          | COF                                                              | Initial con. of 20 ppm, photo power of 300 W, catalyst con. of 0.2 ppm.                                                                                                  | 87.3%       | 90 min         | 0.198                     | 7           |
| Photocatalysis/<br>Gas-liquid discharge | TiO <sub>2</sub>                                                 | Initial con. of 50 ppm, pulse Voltage of 8 kV, working gas flow rate of 60 mL min <sup>-1</sup> , pH of 6.0.                                                             | 90.2%       | 10 min         | 0.244                     | 8           |
| PMS                                     | NiCo <sub>2</sub> O <sub>4</sub>                                 | Initial con. of 10 ppm, PMS of 0.8 mM, catalyst con. of 0.1 ppm, pH of 7.0                                                                                               | 98.1%       | 20 min         | 0.182                     | 9           |
| Photocatalysis                          | MgO/g-C <sub>3</sub> N <sub>4</sub>                              | Initial con. of 20 ppm, photo source of sunshine, Na <sub>2</sub> SO <sub>4</sub> = 100 mM, pH of 5.6, cathode bias of -0.5 V.                                           | 96.8%       | 30 min         | 0.167                     | 10          |
| Electrooxidation/PMS                    | PbO <sub>2</sub>                                                 | Initial con. of 10 ppm, PMS = 0.4 mM, current density = 5 mA cm <sup>-2</sup> .                                                                                          | 100%        | 12 min         | 0.239                     | This study  |

## References

1. Chao, J.; Yang, X.; Zhu, Y.; Shen, J., Oxygen doping regulation of Co single atom catalysts for electro-Fenton degradation of tetracycline. *J. Colloid Interf. Sci.* **2024**, *673*, 434-443.
2. Wang, Y.; Lv, M.; Dong, H.; Hassan, M.; Wang, D.; Gong, Z., Electro-assisted heterogeneous peroxymonosulfate activation on NiFe<sub>2</sub>O<sub>4</sub> coated nickel foam cathode for tetracycline degradation: Synergistic efficacy and mechanism. *J. Taiwan Inst. Chem. E.* **2024**, *163*, 105656.
3. Luo, X.; Zhu, R.; Zhao, L.; Gong, X.; Zhang, L.; Fan, L.; Liu, Y., Defective nitrogen doped carbon material derived from nano-ZIF-8 for enhanced in-situ H<sub>2</sub>O<sub>2</sub> generation and tetracycline hydrochloride degradation in electro-Fenton system. *Environ. Res.* **2024**, *251*, 118644.
4. Luo, X.; Zhu, R.; Zhao, L.; Gong, X., Dual-functional electrocatalyst of defective cobalt-nitrogen-doped porous carbon for enhanced in-situ hydrogen peroxide generation and electro-Fenton tetracycline degradation. *Sep. Purif. Technol.* **2024**, *346*, 127451.
5. Balakrishnan, A.; Chinthala, M.; Kumar, A.; Rtimi, S., Construction of dual Z-scheme ternary carbon nitride homojunction pectin microspheres as a multifunctional photocatalyst for tetracycline degradation, H<sub>2</sub>O<sub>2</sub> production, and N<sub>2</sub> fixation. *Chem. Eng. J.* **2024**, *496*, 153899.
6. Jing, S.; Ren, J.; Wang, A.; Cheng, R.; Liang, H.; Liu, H.; Chen, F.; Tsiakaras, P., An efficient photo-Fenton In<sub>2</sub>O<sub>3</sub>@FeIn<sub>2</sub>S<sub>4</sub> composite catalyst for tetracycline degradation. *Chem. Eng. J.* **2024**, *491*, 151549.
7. Hu, Z.; Wang, Y.; Wang, L.; Wang, Q.; Zhang, Q.; Cui, F.; Jiang, G., Synthesis of S-type heterostructure  $\pi$ -COF for photocatalytic tetracycline degradation. *Chem. Eng. J.* **2024**, *479*, 147534.
8. Wang, S.; Zhou, Z.; Zhou, R.; Fang, Z.; Cullen, P. J., Highly synergistic effect for tetracycline degradation by coupling a transient spark gas-liquid discharge with TiO<sub>2</sub> photocatalysis. *Chem. Eng. J.* **2022**, *450*, 138409.
9. Chen, Y.; Zhu, K.; Qin, W.; Jiang, Z.; Hu, Z.; Sillanpää, M.; Yan, K., Enhanced electron transfer using NiCo<sub>2</sub>O<sub>4</sub>@C hollow nanocages with an electron-shuttle effect for efficient tetracycline degradation. *Chem. Eng. J.* **2024**, *488*, 150786.
10. Sun, J.; Wu, H.; Fu, C.; Zhang, C.; Hu, Z.; Zhou, M., Novel Fenton-like system based on bifunctional MgO/g-C<sub>3</sub>N<sub>4</sub> S-scheme heterojunction photoanode for efficient tetracycline degradation. *Appl. Catal. B-Environ.* **2024**, *351*, 123976.
